# Supplementary material
Source: PubMed Central journal article supplement (PMC4388278)
Supplement: NIHMS666447-supplement-supplement_1.pdf [file NIHMS666447-supplement-supplement_1.pdf]

Differentiation of K562 cells

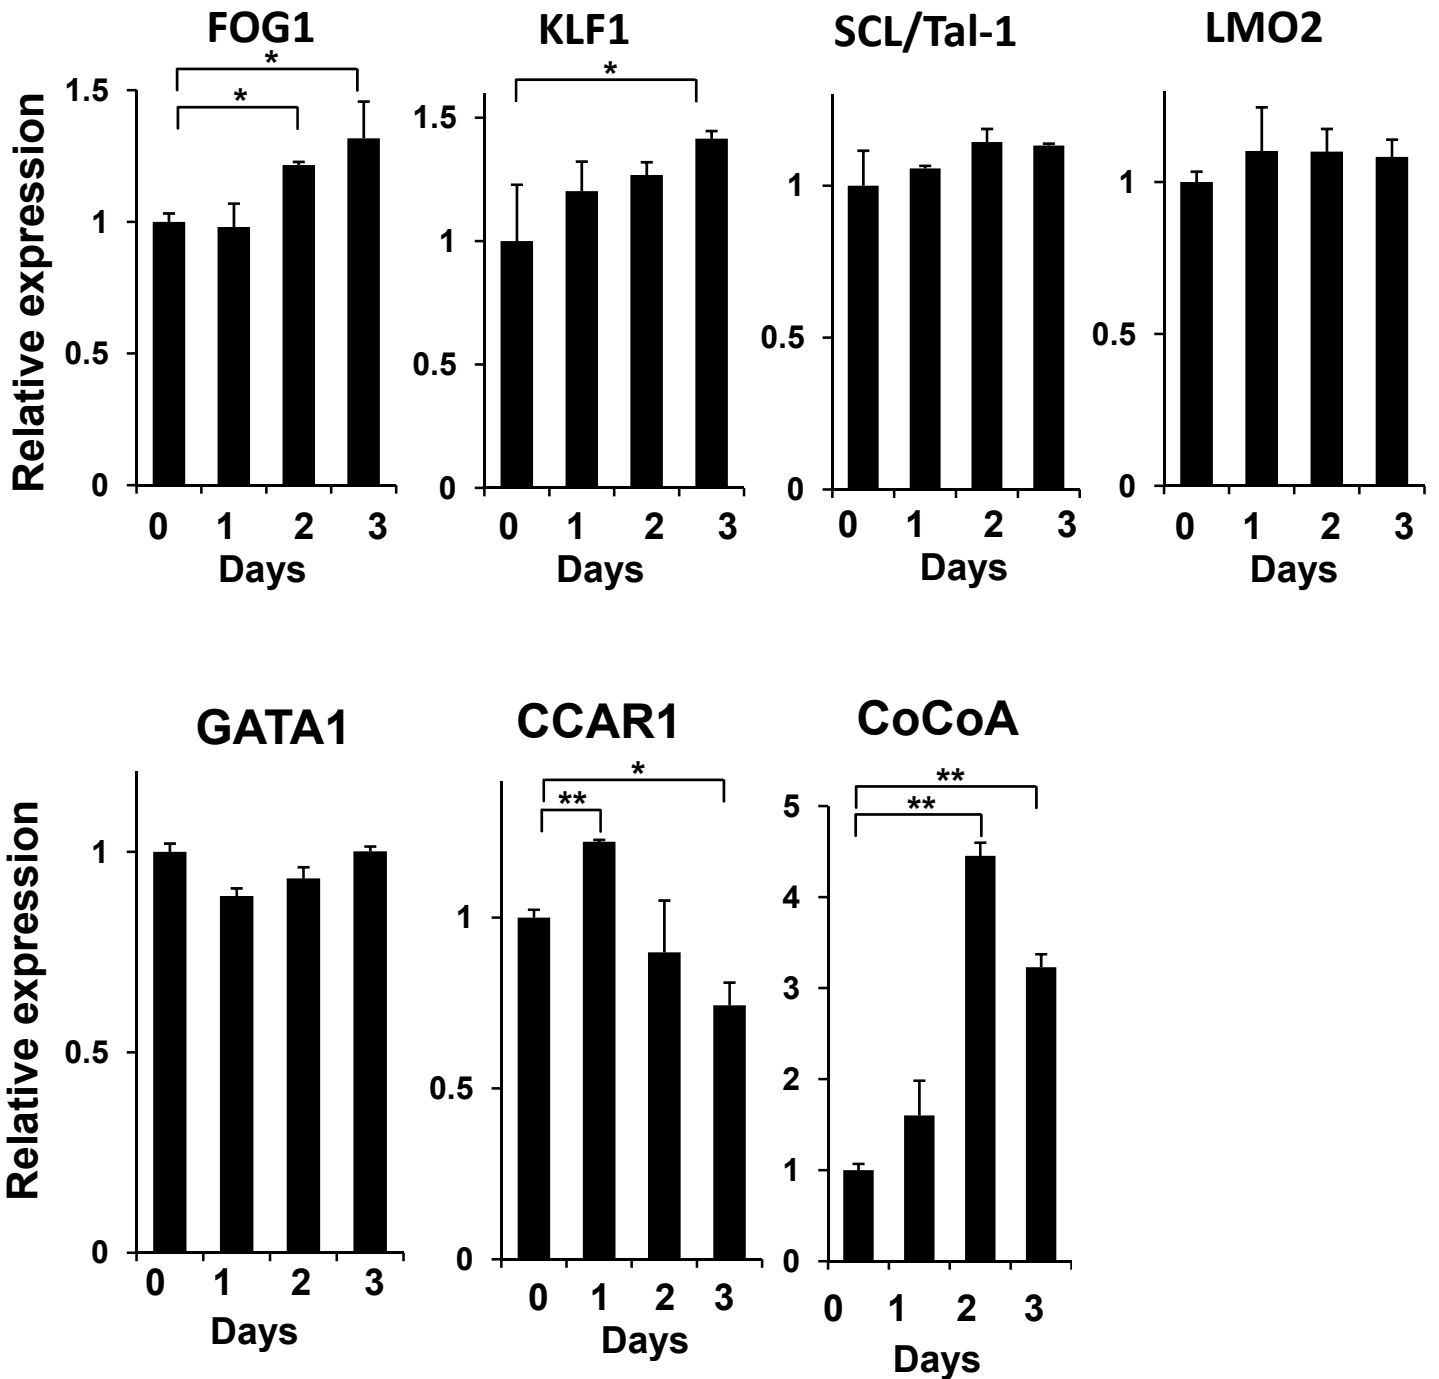

**Figure S1.** RT-PCR of GATA1 and GATA1-associated activators and coactivators in hemin-treated K562 cells. Values (mean  $\pm$  SD) of a representative experiment performed in triplicate are shown (\* $p$  < .05, \*\* $p$  < .01).

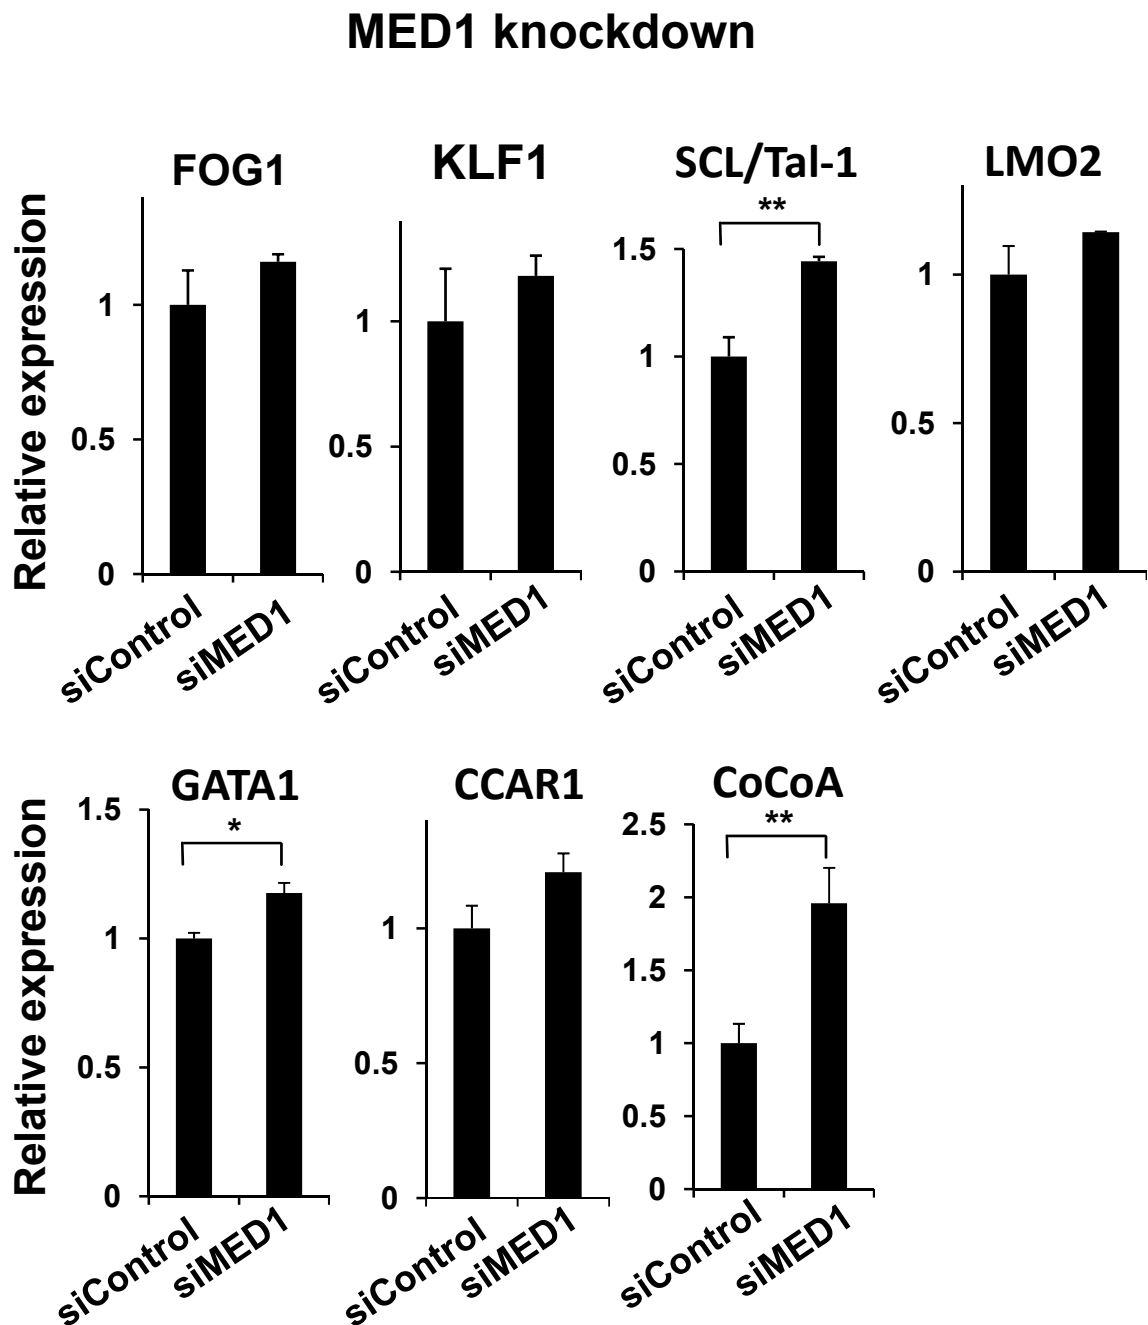

**Figure S2.** RT-PCR of GATA1 and GATA1-associated activators and coactivators 3 days after transfection with hMED1 or control siRNA in hemin-treated K562 cells. Values (mean  $\pm$  SD) of a representative experiment performed in triplicate are shown (\* $p < .05$ , \*\* $p < .01$ ).

Figure S3

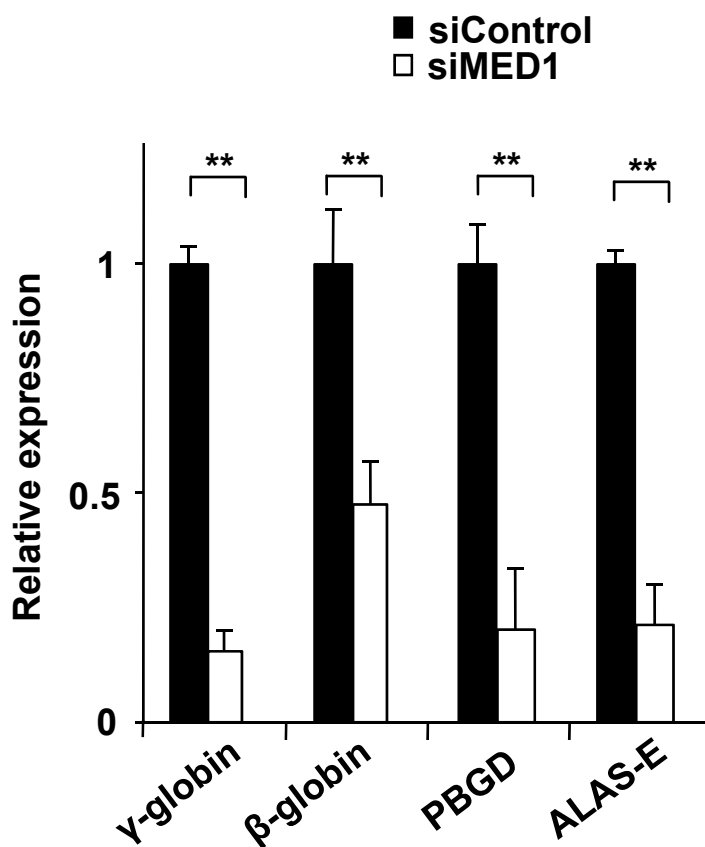

**Figure S3.** Reduced GATA1-targeted gene transcription 3 days after transfection with hMED1 or control siRNA in hemin-untreated K562 cells. Values (mean  $\pm$  SD) of a representative experiment performed in triplicate are shown (\*\* $p < .01$ ).

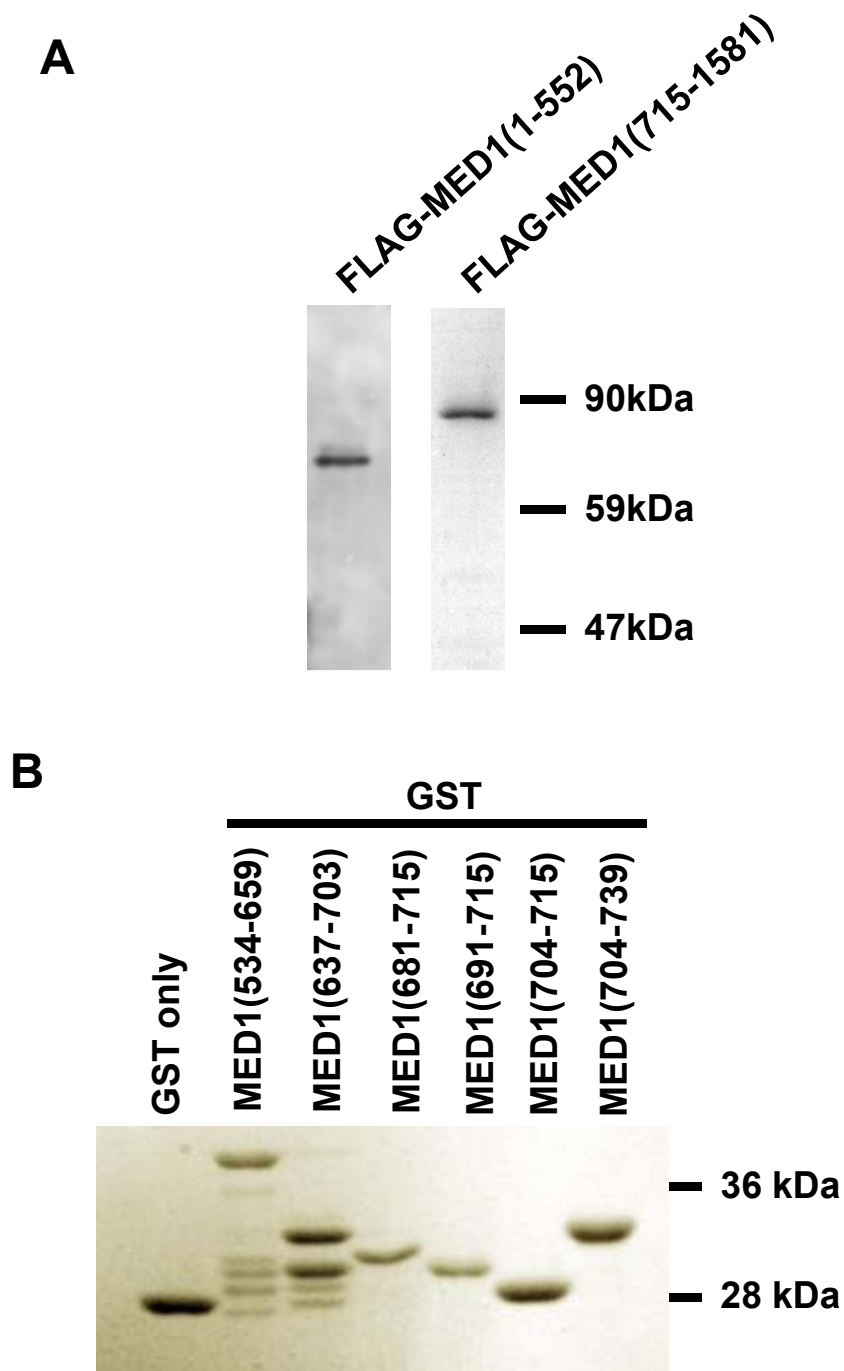

**Figure S4.** Recombinant proteins.

(A) Western blot analyses of baculovirus expressed FLAG-tagged MED1 truncations. Anti-FLAG antibody was used.

(B) Coomassie staining of GST and GST-fused MED1 truncations. 0.5  $\mu$ g (GST-fused MED1(534–659), MED1(681–715), MED1(691–715)) or 1  $\mu$ g (others) of proteins are shown.

Figure S5

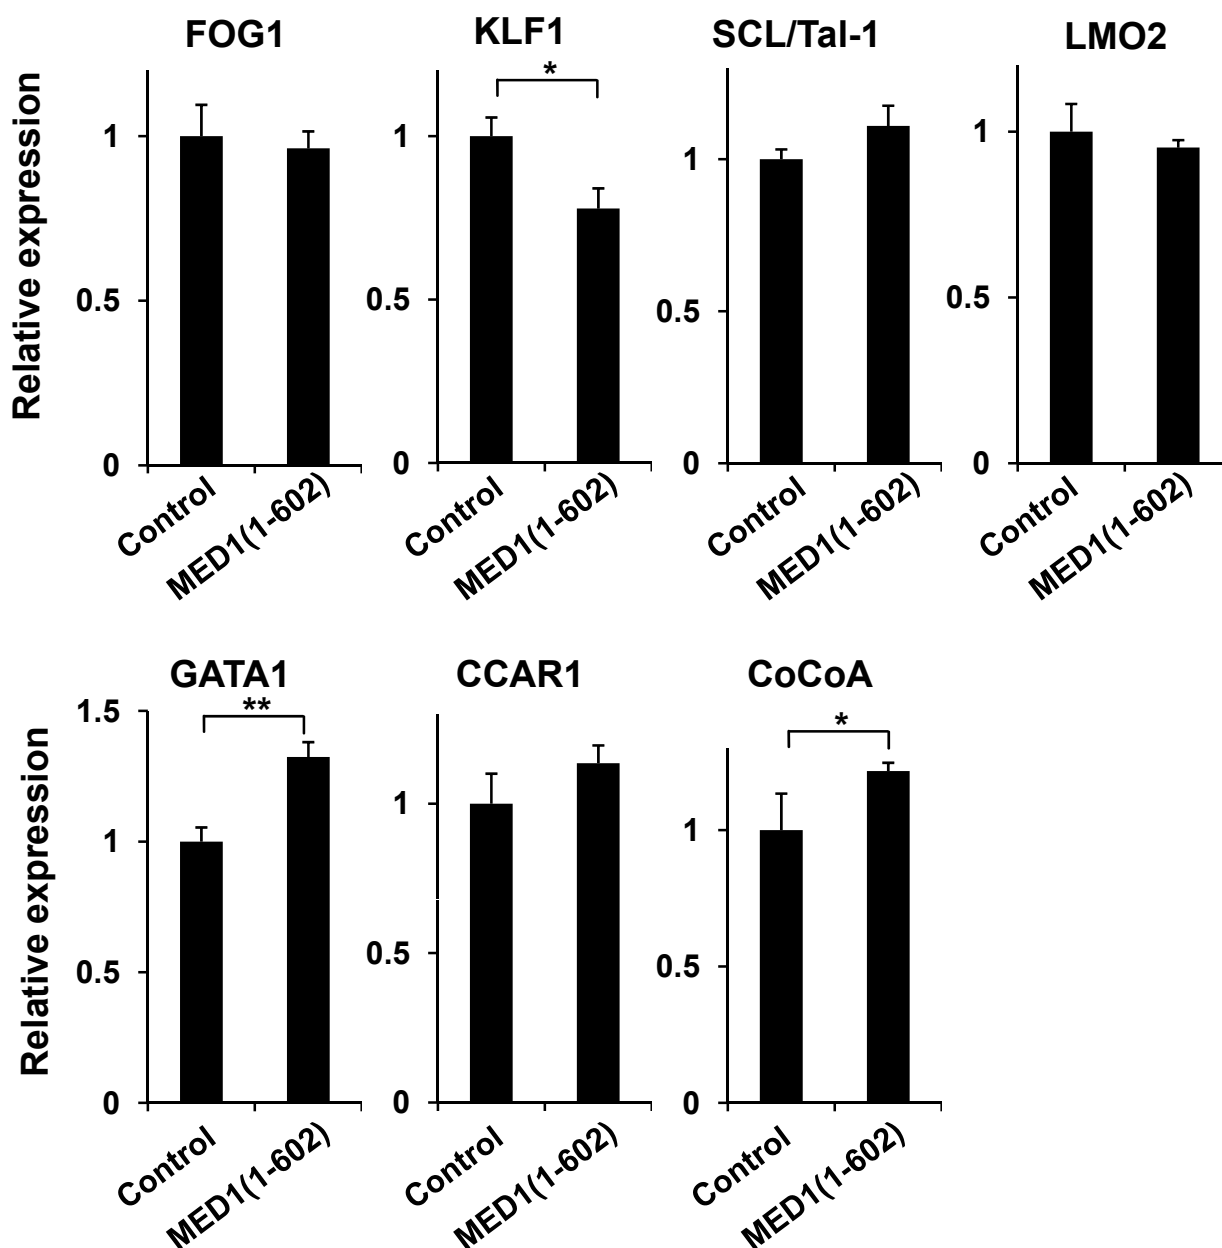

**Figure S5.** RT-PCR of GATA1 and GATA1-associated activators and coactivators in hemin-treated K562 cells 3 days after transfection with MED1(1-602) or control empty expression vector. Values (mean  $\pm$  SD) of a representative experiment performed in triplicate are shown (\* $p$  < .05, \*\* $p$  < .01).

Figure S6

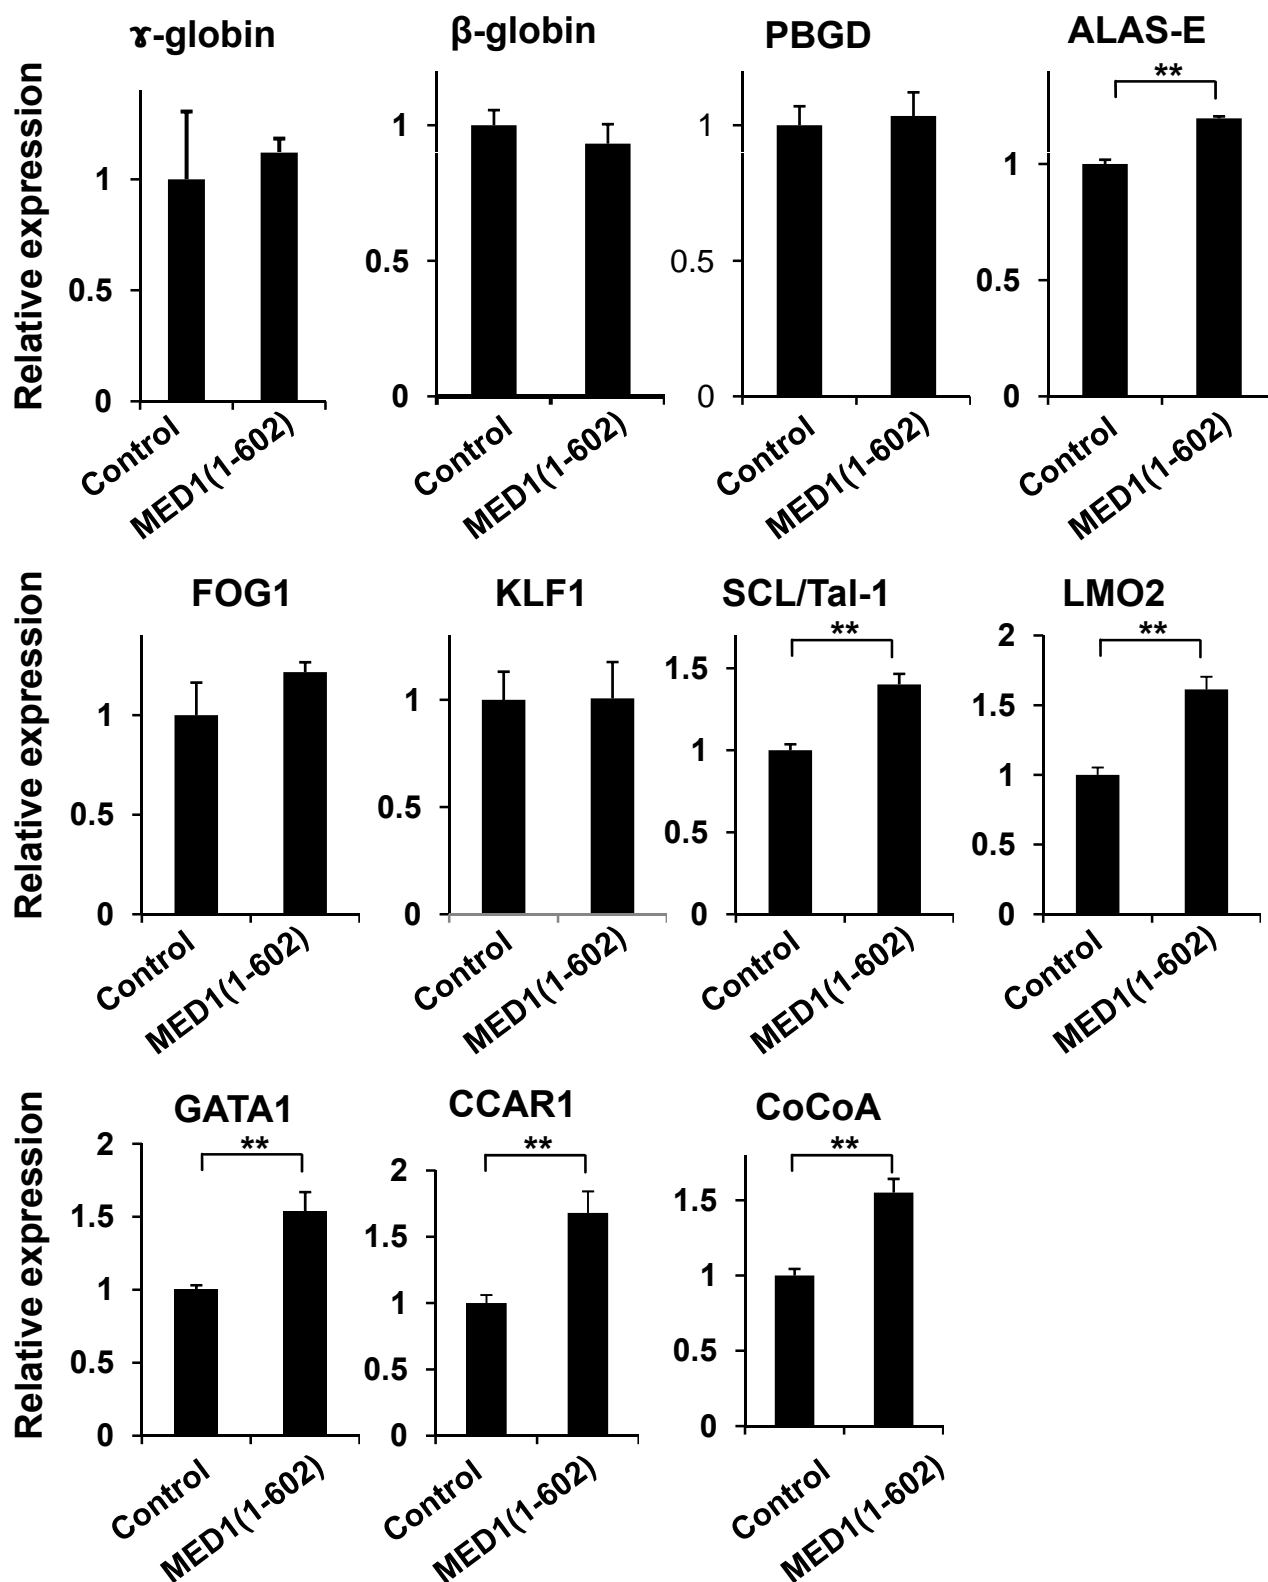

**Figure S6.** RT-PCR of GATA1-targeted gene products, GATA1, and GATA1-associated activators and coactivators in hemin-untreated K562 cells 3 days after transfection with MED1(1–602) or control empty expression vector. Values (mean  $\pm$  SD) of a representative experiment performed in triplicate are shown (\*\* $p < .01$ ).

Figure S7

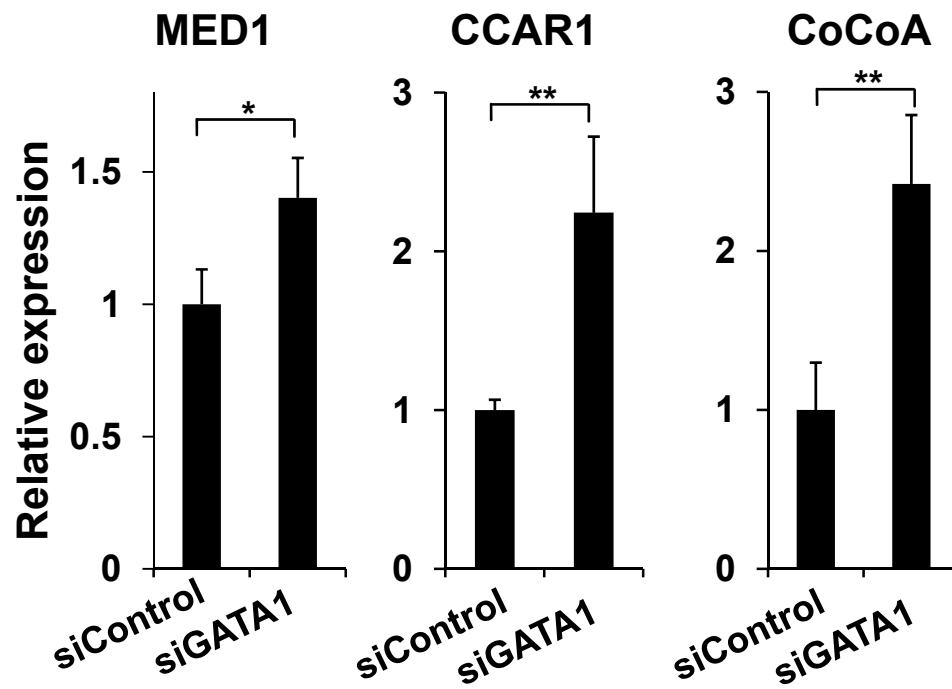

**Figure S7.** RT-PCR of MED1, CCAR1 and CoCoA in K562 cells 3 days after transfection with hGATA1 or control siRNA. Values (mean  $\pm$  SD) of a representative experiment performed in triplicate are shown (\* $p$  < .05, \*\* $p$  < .01).

Figure S8

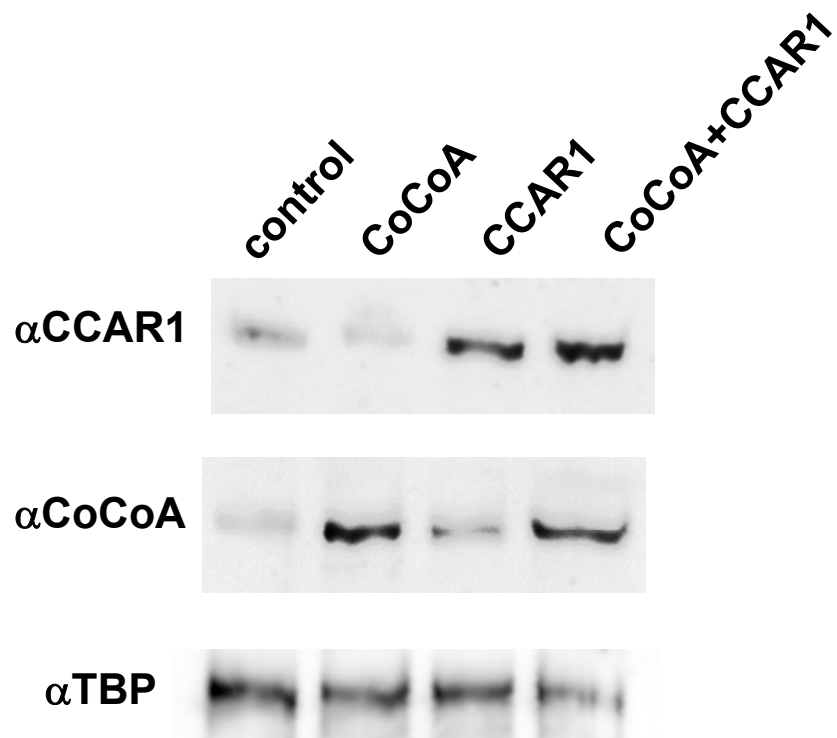

**Figure S8.** Western blot analyses of CCAR1 and/or CoCoA overexpression in K562 cells. Anti-CCAR1 and anti-CoCoA antibodies, and anti-TBP antibody as a control, were used.



Figure S9

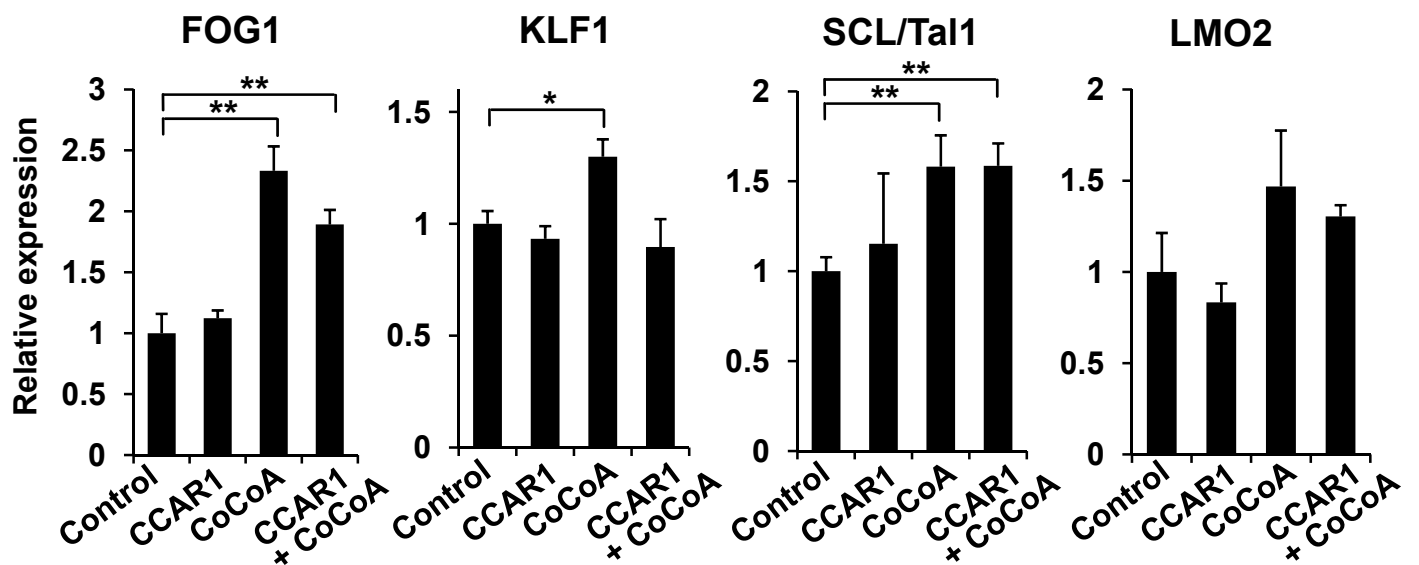

**Figure S9.** RT-PCR of GATA1-associated activators in hemin-treated K562 cells 3 days after transfection with CCAR1, CoCoA and/or control empty expression vectors. Values (mean  $\pm$  SD) of a representative experiment performed in triplicate are shown (\* $p < .05$ , \*\* $p < .01$ ).
